# Supplementary material for: Observations of Dust Particle Orientation with the SolPol direct sun polarimeter
Source: Copernicus journal article supplement (doi:10.5194/amt-2023-121), 2023-06-16
Supplement: Supplementary file 2 [file amt-2023-121-supplement.zip]

Archive with 2 entries (2 files):
- SolPol_manual.pdf
- SolPol_Dark_Tests_suppl.pdf
